# Supplementary material for: General synthesis of carbon-guarded cobalt-based nanospheres for oxygen reduction electrocatalysis
Source: Royal Society of Chemistry journal article supplement (doi:10.1039/d3cy01209c), 2023-01-01
Supplement: d3cy01209c1.pdf [file d3cy01209c1.pdf]

## Supporting information

### **A general synthesis of carbon-guarded cobalt-based nanospheres for oxygen reduction electrocatalysis**

Shaoyang Niu<sup>a</sup>, Sisi Wei<sup>a</sup>, Dandan Yue<sup>a</sup>, Yezheng Cai<sup>a,b,\*</sup>, Zhaoling Ma<sup>a</sup>, Kui Liu<sup>a</sup>, Youguo Huang<sup>a</sup>, Hongqiang Wang<sup>a</sup>, Qingyu Li<sup>a,\*</sup>, Tian-Nan Ye<sup>b,\*</sup>

<sup>a</sup> Guangxi Key Laboratory of Low Carbon Energy Materials, Guangxi New Energy Ship Battery Engineering Technology Research Center, Guangxi scientific and technological achievements transformation pilot research base of electrochemical energy materials and devices, School of Chemistry and Pharmaceutical Sciences, Guangxi Normal University, Guilin 541004, China

<sup>b</sup> School of Chemistry and Chemical Engineering, Frontiers Science Center for Transformative Molecules, Shanghai Jiao Tong University, Shanghai 200240, China

\*Corresponding authors: yezhengcai@163.com (Y. Cai); liqingyu62@126.com (Q. Li); ytn2011@sjtu.edu.cn (T. Ye)

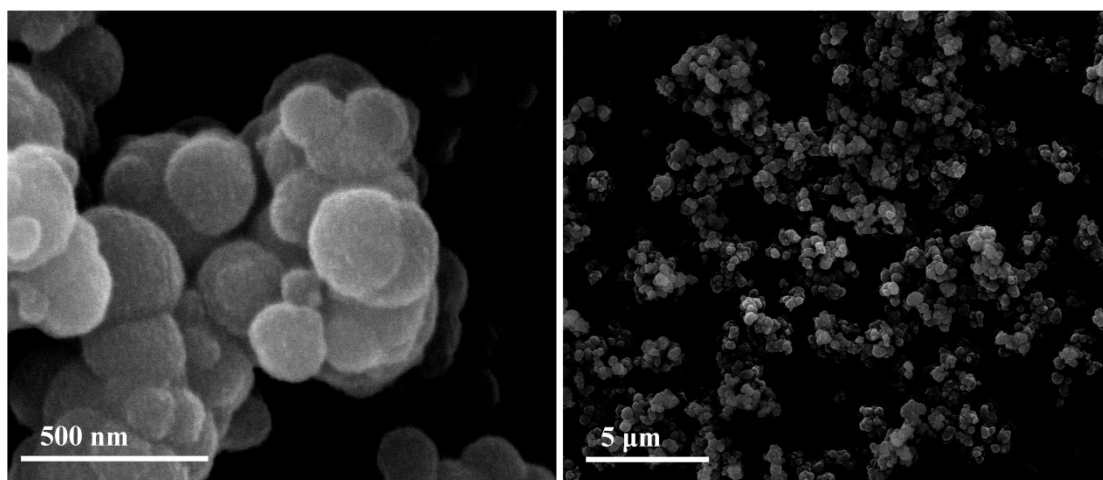

Fig. S1 SEM image of Ni/Co microspheres.

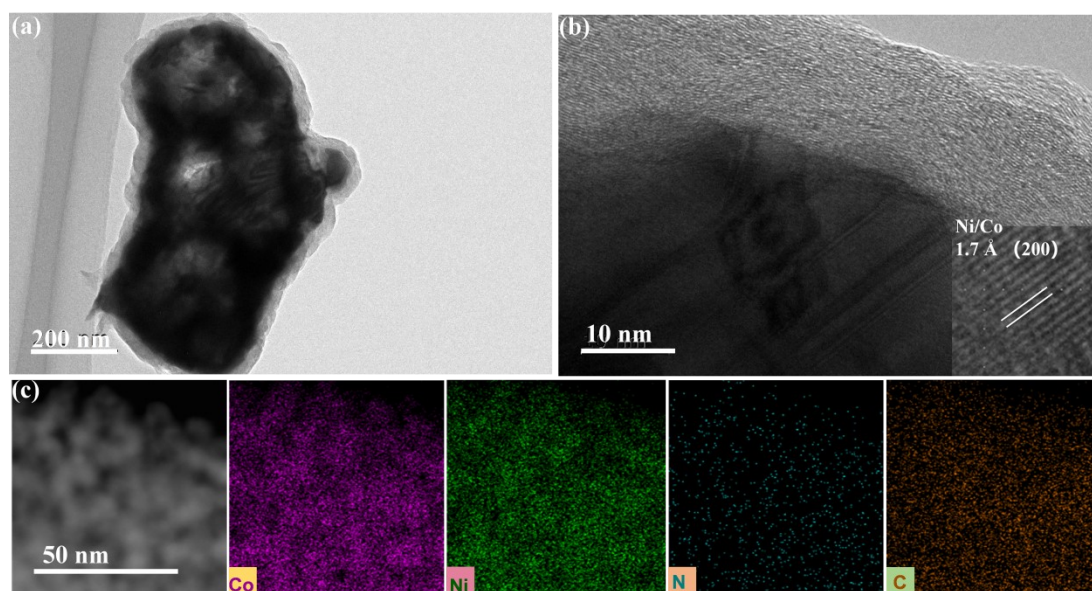

Fig. S2 (a) TEM image, (b) high resolution TEM image, and (c) elemental mappings of Ni/Co@NC Ps.

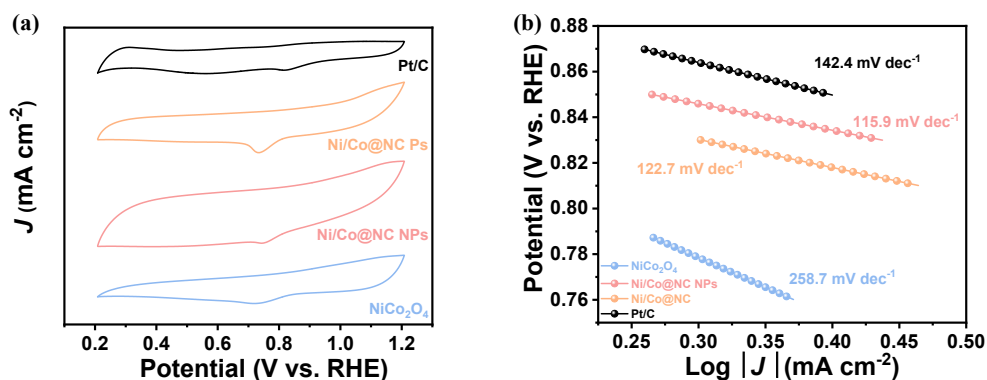

Fig. S3 (a-b) CV curves (a) Tafel plots (b) in  $O_2$ -saturated 0.1 M KOH aqueous solution of the catalysts.

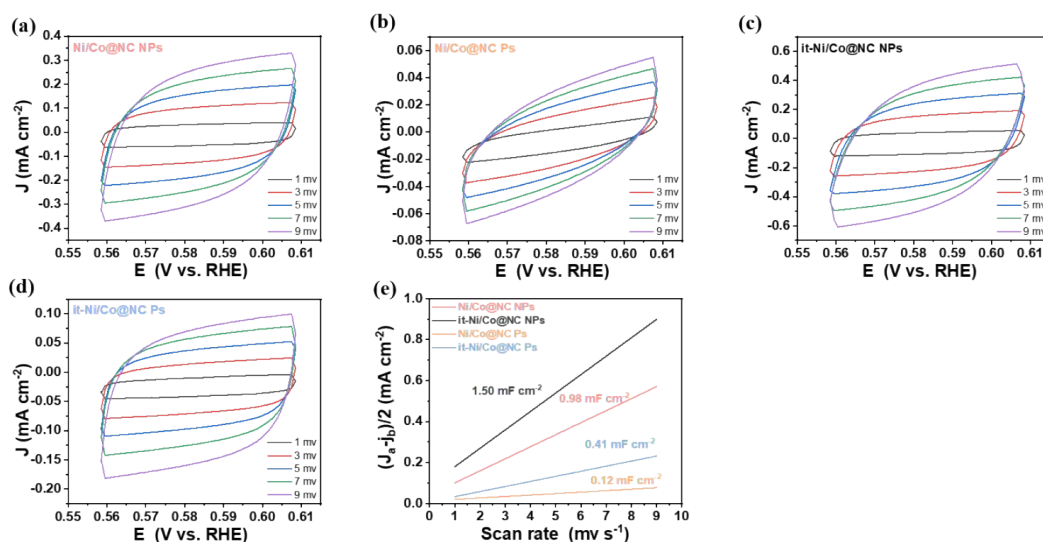

Fig. S4 (a-d) CV curves and (e) the half of capacitive current density difference between  $J_a$  and  $J_c$  as a function of scan rate of the Ni/Co@NC NPs and Ni/Co@NC Ps before and after recording  $i$ - $t$  measurements.

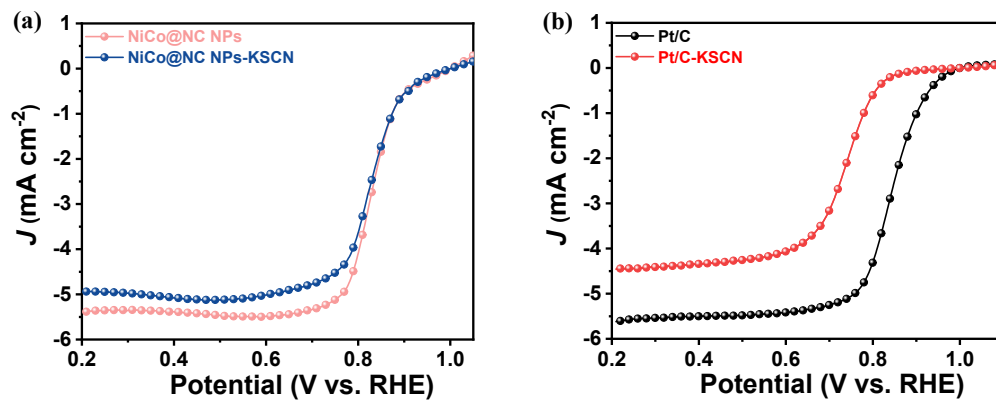

Fig. S5 LSV curves of (a) Ni/Co@NC NPs and (b) Pt/C with and without KSCN solution.

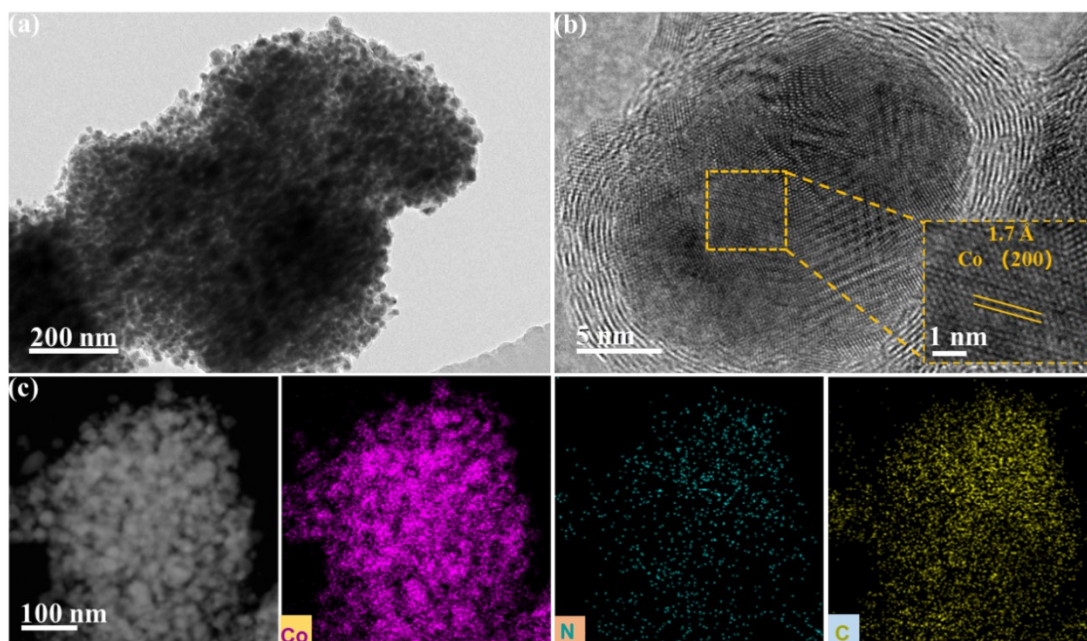

Fig. S6 (a) TEM image, (b) high resolution TEM image, and (c) elemental mappings of Co@NC NPs.

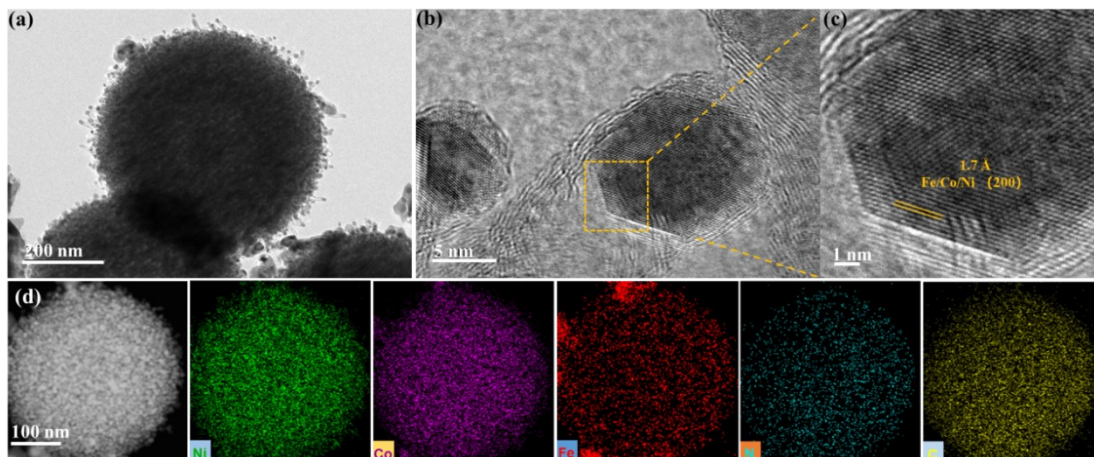

Fig. S7 (a) TEM image, (b-d) high resolution TEM image, and (e) elemental mappings of Fe/Co/Ni@NC NPs.

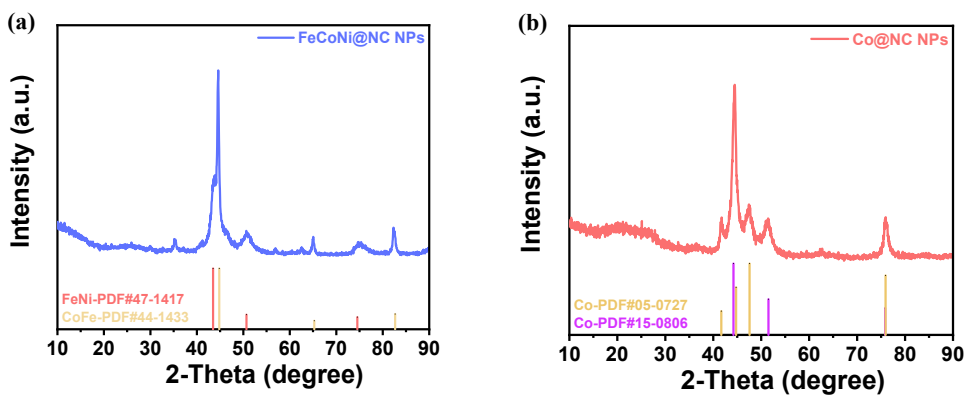

Fig. S8 XRD patterns of (a) Fe/Co/Ni@NC NPs and (b) Co@NC NPs.



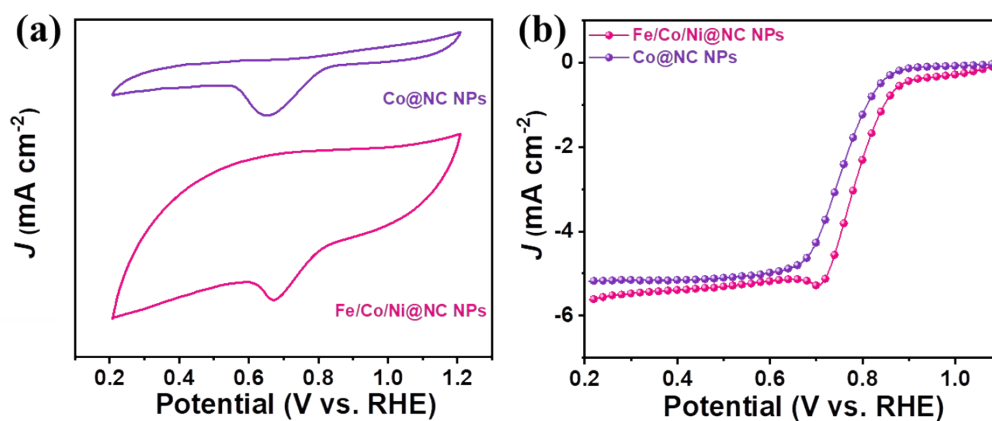

Fig. S9 CV curves (a) LSV curves (b) of Co@NC NPs and Fe/Co/Ni@NC NPs in O<sub>2</sub>-saturated 0.1 M NaOH aqueous solution.

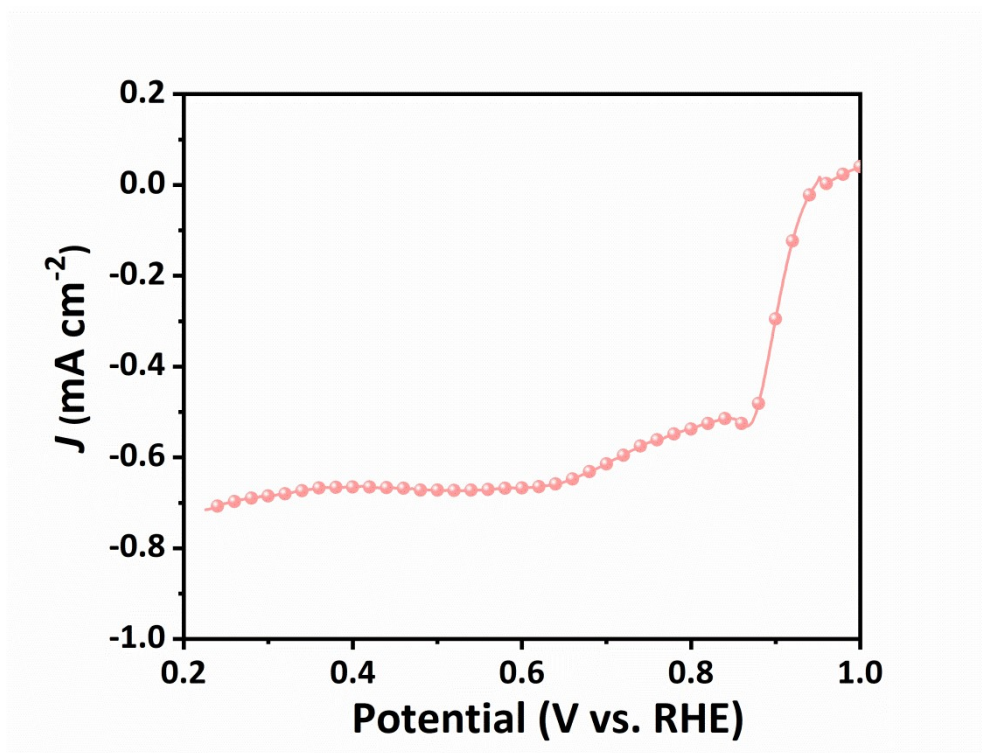

Fig. S10 The in situ LSV curve while recording the Raman spectra of Ni/Co@NC NPs.

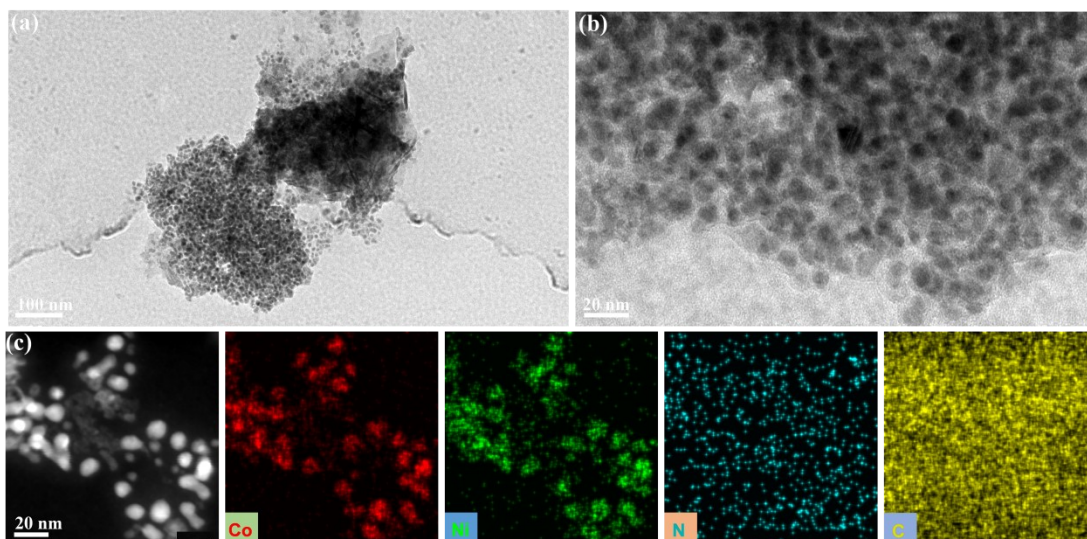

Fig. S11 (a) TEM image, (b) high resolution TEM image, and (c) elemental mappings of Ni/Co@NC NPs after complete discharging of ZAB.

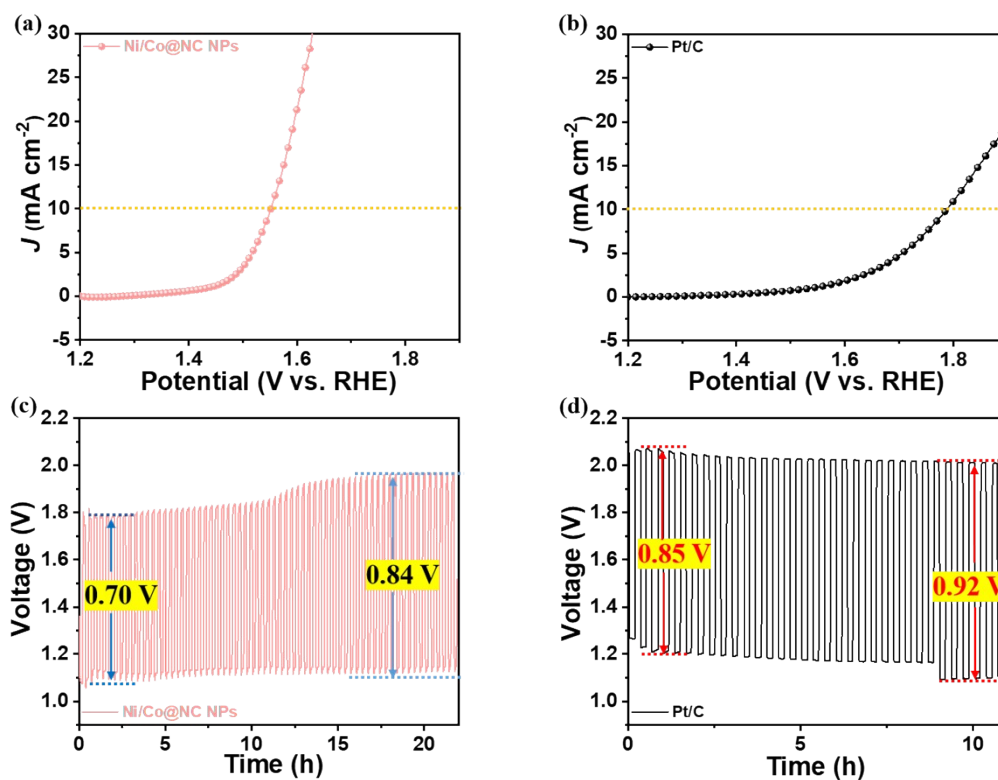

Fig. S12 (a-b) OER curves of Ni/Co@NC NPs (a) and Pt/C (b) in 1 M KOH aqueous solution; (c-d) Long-term charge-discharge cycle curves of ZABs driven by Ni/Co@NC NPs (c) and Pt/C (d) at 5 mA cm<sup>-2</sup>.

Table S1 Surface compositions of Ni/Co@NC NPs and Ni/Co@NC Ps examined by XPS.

| Elements\Catalysts | Ni/Co@NC NPs<br>atomic ratio (%) | Ni/Co@NC Ps<br>atomic ratio (%) |
|--------------------|----------------------------------|---------------------------------|
| Ni                 | 14.26                            | 12.00                           |
| Co                 | 22.41                            | 16.70                           |
| C                  | 17.78                            | 44.18                           |
| O                  | 17.37                            | 20.12                           |
| N                  | 28.18                            | 7.00                            |

Table S2 Electrocatalytic ORR performances of obtained Ni/Co@NC NPs and the recently reported Ni/Co-related non-precious catalysts.

| S.No. | Catalyst                                  | Half wave potential<br>(V vs. RHE) | Reference |
|-------|-------------------------------------------|------------------------------------|-----------|
| 1     | Ni/Co@NC NPs                              | 0.83                               | This work |
| 2     | CoNi-NC                                   | 0.83                               | 1         |
| 3     | CoFe/N-GCT                                | 0.79                               | 2         |
| 4     | FeCo-NCNFs800                             | 0.81                               | 3         |
| 5     | CoNi/BCF                                  | 0.81                               | 4         |
| 6     | NiCo/PFC                                  | 0.79                               | 5         |
| 7     | NiO/CoN                                   | 0.68                               | 6         |
| 8     | FeCo-NCps                                 | 0.84                               | 7         |
| 9     | Meso/micro-FeCo-N <sub>x</sub> -CN        | 0.83                               | 8         |
| 10    | CoNi-SAs/NC                               | 0.76                               | 9         |
| 11    | Ni-N <sub>4</sub> /GHSs/Fe-N <sub>4</sub> | 0.83                               | 10        |
| 12    | NiCo <sub>2</sub> S <sub>4</sub> /CNNs    | 0.83                               | 11        |



## References

- 1 G. Kumar and R. S. Dey, *Inorg. Chem.*, 2023, **62**, 13519-13529.
- 2 X. Liu, L. Wang, P. Yu, C. Tian, F. Sun, J. Ma, W. Li and H. Fu, *Angew. Chem. Int. Ed.*, 2018, **57**, 16166-16170.
- 3 L. Yang, S. Feng, G. Xu, B. Wei and L. Zhang, *ACS Sustain. Chem. Eng.*, 2019, **7**, 5462-5475.
- 4 W. Wan, X. Liu, H. Li, X. Peng, D. Xi and J. Luo, *Appl. Catal. B: Environ.*, 2019, **240**, 193-200.
- 5 G. Fu, Y. Chen, Z. Cui, Y. Li, W. Zhou, S. Xin, Y. Tang and J. B. Goodenough, *Nano Lett*, 2016, **16**, 6516-6522.
- 6 J. Yin, Y. Li, F. Lv, Q. Fan, Y. Q. Zhao, Q. Zhang, W. Wang, F. Cheng, P. Xi and S. Guo, *ACS Nano*, 2017, **11**, 2275-2283.
- 7 J. Liu, T. He, Q. Wang, Z. Zhou, Y. Zhang, H. Wu, Q. Li, J. Zheng, Z. Sun, Y. Lei, J. Ma and Y. Zhang, *J. Mater. Chem. A*, 2019, **7**, 12451-12456.
- 8 S. Li, C. Cheng, X. Zhao, J. Schmidt and A. Thomas, *Angew. Chem. Int. Ed.*, 2018, **57**, 1856-1862.
- 9 X. Han, X. Ling, D. Yu, D. Xie, L. Li, S. Peng, C. Zhong, N. Zhao, Y. Deng and W. Hu, *Adv. Mater.*, 2019, **31**, e1905622.
- 10 J. Chen, H. Li, C. Fan, Q. Meng, Y. Tang, X. Qiu, G. Fu and T. Ma, *Adv. Mater.*, 2020, **32**, e2003134.
- 11 X. Liang, J. Chen, B. Hong, T. Wan, W. Weng and W. Xiao, *J. Energy Chem.*, 2022, **74**, 212-217.
